# Supplementary material for: The characteristics of screening and confirmatory test results for HIV in Xi’an, China
Source: PLoS One. 2017 Jul 7;12(7):e0180071. doi: 10.1371/journal.pone.0180071 (PMC5501483; doi:10.1371/journal.pone.0180071)
Supplement: S1 File — The data that processed anonymously were from the Xi'an Center for Disease Control and Prevention (CDC). (XLSX) [file pone.0180071.s001.xlsx]

## Sheet: Sheet1
Initial screening(n=309)				Duplicate retesting				Western blot
								gag				pol			env			QC	HIV-2 band
Age	Gender	Result	Kit	Result	Kit1	Result	Kit2	p17	p24	p39	p55	p31	p51	p66	gp41	gp120	gp160
30	male	294.67	ABBOTT	293.85	ABBOTT	19.25	WanTai	√	√	√	√	√	√	√	√	√	√	√
26	male	510.54	ABBOTT	514.16	ABBOTT	34.53	WanTai	√	√	√	√	√	√	√	√	√	√	√
54	female	394.89	ABBOTT	388.93	ABBOTT	19.23	XinChuang	√	√	√	√	√	√	√	√	√	√	√
24	male	461.64	ABBOTT	464.82	ABBOTT	21.02	WanTai	√	√	√	√	√	√	√	√	√	√	√
28	male	345.89	ABBOTT	351.16	ABBOTT	18.904	XinChuang	√	√	√	√	√	√	√	√	√	√	√
36	male	408.33	ABBOTT	406.57	ABBOTT	18.92	WanTai	√	√	√	√	√	√	√	√	√	√	√
34	male	390.33	ABBOTT	404.93	ABBOTT	18.74	XinChuang	√	√	√	√	√	√	√	√	√	√	√
32	male	502.9	ABBOTT	521.16	ABBOTT	19.968	WanTai	√	√	√	√	√	√	√	√	√	√	√
49	male	422.13	ABBOTT	420.05	ABBOTT	27.2	WanTai	√	√	√	√	√	√	√	√	√	√	√
48	female	210	ABBOTT	198.7	ABBOTT	17.65	XinChuang	√	√	√	√	√	√	√	√	√	√	√
55	male	454.87	ABBOTT	457.07	ABBOTT	17.83	XinChuang	√	√	√	√	√	√	√	√	√	√	√
19	male	728.24	ABBOTT	734.52	ABBOTT	21.11	XinChuang	√	√	√	√	√	√	√	√	√	√	√
41	male	810	ABBOTT	725.6	ABBOTT	32.511	WanTai	√	√	√	√	√	√	√	√	√	√	√
42	male	318	ABBOTT	317.9	ABBOTT	9.93	XinChuang	√	√	√	√	√	√	√	√	√	√	√
29	male	291.17	ABBOTT	290.25	ABBOTT	19.04	Livzon	√	√	√	√	√	√	√	√	√	√	√
27	male	382.02	ABBOTT	405.19	ABBOTT	10.966	WanTai	√	√	√	√	√	√	√	√	√	√	√
39	male	990.98	ABBOTT	879.67	ABBOTT	35.67	Livzon	√	√	√	√	√	√	√	√	√	√	√
36	female	392.29	ABBOTT	389.02	ABBOTT	21.02	Livzon	√	√	√	√	√	√	√	√	√	√	√
64	male	516.9	ABBOTT	517.2	ABBOTT	20.13	XinChuang	√	√	√	√	√	√	√	√	√	√	√
34	male	470.53	ABBOTT	481.26	ABBOTT	38.92	XinChuang	√	√	√	√	√	√	√	√	√	√	√
25	male	754.01	ABBOTT	771.85	ABBOTT	17.198	WanTai	√	√	√	√	√	√	√	√	√	√	√
36	male	498.07	ABBOTT	505.19	ABBOTT	16.678	WanTai	√	√	√	√	√	√	√	√	√	√	√
36	male	633.67	ABBOTT	681.02	ABBOTT	29.513	XinChuang	√	√	√	√	√	√	√	√	√	√	√
56	male	828.74	ABBOTT	828.6	ABBOTT	43.21	XinChuang	√	√	√	√	√	√	√	√	√	√	√
38	male	939.62	ABBOTT	915.49	ABBOTT	39.89	XinChuang	√	√	√	√	√	√	√	√	√	√	√
35	male	653.41	ABBOTT	654.32	ABBOTT	24.23	Livzon	√	√	√	√	√	√	√	√	√	√	√
25	male	541.77	ABBOTT	543.68	ABBOTT	15.41	WanTai	√	√	√	√	√	√	√	√	√	√	√
30	male	470.55	ABBOTT	472.35	ABBOTT	17.5948	XinChuang	√	√	√	√	√	√	√	√	√	√	√
40	male	353.89	ABBOTT	354.01	ABBOTT	22.52	XinChuang	√	√	√	√	√	√	√	√	√	√	√
70	male	849.07	ABBOTT	842.44	ABBOTT	45.82	XinChuang	√	√	√	√	√	√	√	√	√	√	√
55	male	519.61	ABBOTT	509.32	ABBOTT	25.63	XinChuang	√	√	√	√	√	√	√	√	√	√	√
23	male	407.95	ABBOTT	393.61	ABBOTT	23.37	Livzon	√	√	√	√	√	√	√	√	√	√	√
35	male	559.25	ABBOTT	547.3	ABBOTT	27.45	LivzonE	√	√	√	√	√	√	√	√	√	√	√
21	male	928.38	ABBOTT	917.58	ABBOTT	17.74	XinChuang	√	√	√	√	√	√	√	√	√	√	√
51	male	351.49	ABBOTT	350.2	ABBOTT	9.59	XinChuang	√	√	√	√	√	√	√	√	√	√	√
47	male	472.14	ABBOTT	483.15	ABBOTT	17.84	XinChuang	√	√	√	√	√	√	√	√	√	√	√
39	male	513.34	ABBOTT	514.24	ABBOTT	25.35	XinChuang	√	√	√	√	√	√	√	√	√	√	√
45	male	264.82	ABBOTT	268.35	ABBOTT	17.56	XinChuang	√	√	√	√	√	√	√	√	√	√	√
55	male	929.85	ABBOTT	929.45	ABBOTT	32.34	XinChuang	√	√	√	√	√	√	√	√	√	√	√
41	male	258.19	ABBOTT	258.19	ABBOTT	13.11	XinChuang	√	√	√	√	√	√	√	√	√	√	√
48	male	675.34	ABBOTT	669.5	ABBOTT	25.89	Livzon	√	√	√	√	√	√	√	√	√	√	√
54	male	202.79	ABBOTT	203.02	ABBOTT	16.15	XinChuang	√	√	√	√	√	√	√	√	√	√	√
35	male	732.7	ABBOTT	721.1	ABBOTT	30.67	XinChuang	√	√	√	√	√	√	√	√	√	√	√
48	male	992.66	ABBOTT	1022.46	ABBOTT	32.68	XinChuang	√	√	√	√	√	√	√	√	√	√	√
49	male	674.88	ABBOTT	676.51	ABBOTT	27.18	XinChuang	√	√	√	√	√	√	√	√	√	√	√
30	male	276.88	ABBOTT	276.88	ABBOTT	14.65	Livzon	√	√	√	√	√	√	√	√	√	√	√
43	male	632	ABBOTT	633	ABBOTT	24.53	WanTai	√	√	√	√	√	√	√	√	√	√	√
23	male	668.14	ABBOTT	666.36	ABBOTT	23.16	WanTai	√	√	√	√	√	√	√	√	√	√	√
51	female	518.16	ABBOTT	518.38	ABBOTT	18.92	WanTai	√	√	√	√	√	√	√	√	√	√	√
33	male	622.26	ABBOTT	714.34	ABBOTT	20.895	WanTai	√	√	√	√	√	√	√	√	√	√	√
27	male	637.31	ABBOTT	643.16	ABBOTT	22.348	WanTai	√	√	√	√	√	√	√	√	√	√	√
17	female	519	ABBOTT	552.54	ABBOTT	20.18	XinChuang	√	√	√	√	√	√	√	√	√	√	√
33	male	213.2	ABBOTT	200.2	ABBOTT	21.22	XinChuang	√	√	√	√	√	√	√	√	√	√	√
25	male	596.46	ABBOTT	597.61	ABBOTT	28.67	WanTai	√	√	√	√	√	√	√	√	√	√	√
64	female	812.965	ABBOTT	838.015	ABBOTT	31.246	XinChuang	√	√	√	√	√	√	√	√	√	√	√
47	male	497.28	ABBOTT	492.37	ABBOTT	28.15	XinChuang	√	√	√	√	√	√	√	√	√	√	√
56	male	465.98	ABBOTT	467.32	ABBOTT	17.35	WanTai	√	√	√	√	√	√	√	√	√	√	√
43	male	578.45	ABBOTT	601.02	ABBOTT	16.71	WanTai	√	√	√	√	√	√	√	√	√	√	√
28	male	703.24	ABBOTT	700.57	ABBOTT	3.67	XinChuang	√	√	√	√	√	√	√	√	√	√	√
28	male	583.37	ABBOTT	580.04	ABBOTT	18.64	XinChuang	√	√	√	√	√	√	√	√	√	√	√
50	male	318.06	ABBOTT	289.57	ABBOTT	5.86	XinChuang	√	√	√	√	√	√	√	√	√	√	√
38	male	395.37	ABBOTT	396.45	ABBOTT	17.98	WanTai	√	√	√	√	√	√	√	√	√	√	√
33	male	925.37	ABBOTT	917.92	ABBOTT	11.24	XinChuang	√	√	√	√	√	√	√	√	√	√	√
29	male	551.22	ABBOTT	513	ABBOTT	16.23	XinChuang	√	√	√	√	√	√	√	√	√	√	√
22	male	638.99	ABBOTT	629.41	ABBOTT	23.037	WanTai	√	√	√	√	√	√	√	√	√	√	√
38	male	485.84	ABBOTT	879	ABBOTT	35.12	WanTai	√	√	√	√	√	√	√	√	√	√	√
52	male	364.62	ABBOTT	354.12	ABBOTT	25.12	WanTai	√	√	√	√	√	√	√	√	√	√	√
22	male	339.25	ABBOTT	340.82	ABBOTT	16.6987	XinChuang	√	√	√	√	√	√	√	√	√	√	√
36	male	311.44	ABBOTT	314.4	ABBOTT	18.54	XinChuang	√	√	√	√	√	√	√	√	√	√	√
32	male	635.26	ABBOTT	610.22	ABBOTT	19.78	XinChuang	√	√	√	√	√	√	√	√	√	√	√
44	female	881.41	ABBOTT	873.38	ABBOTT	21.605	WanTai	√	√	√	√	√	√	√	√	√	√	√
63	male	874.48	ABBOTT	863.55	ABBOTT	21.605	WanTai	√	√	√	√	√	√	√	√	√	√	√
27	male	485.37	ABBOTT	537.34	ABBOTT	32.12	XinChuang	√	√	√	√	√	√	√	√	√	√	√
30	male	594.98	ABBOTT	595.21	ABBOTT	19.03	XinChuang	√	√	√	√	√	√	√	√	√	√	√
52	male	608.13	ABBOTT	607.2	ABBOTT	25.36	WanTai	√	√	√	√	√	√	√	√	√	√	√
31	male	620.43	ABBOTT	621.52	ABBOTT	18.65	WanTai	√	√	√	√	√	√	√	√	√	√	√
33	male	537.13	ABBOTT	528.19	ABBOTT	28.01	XinChuang	√	√	√	√	√	√	√	√	√	√	√
32	male	317.24	ABBOTT	312.99	ABBOTT	19.03	XinChuang	√	√	√	√	√	√	√	√	√	√	√
47	male	309	ABBOTT	419.49	ABBOTT	13.383	XinChuang	√	√	√	√	√	√	√	√	√	√	√
51	male	937.12	ABBOTT	792.92	ABBOTT	17.929	XinChuang	√	√	√	√	√	√	√	√	√	√	√
36	male	761.38	ABBOTT	757.26	ABBOTT	22.413	WanTai	√	√	√	√	√	√	√	√	√	√	√
46	male	692.68	ABBOTT	690.12	ABBOTT	17.98	WanTai	√	√	√	√	√	√	√	√	√	√	√
52	male	448.64	ABBOTT	454.03	ABBOTT	10.07	XinChuang	√	√	√	√	√	√	√	√	√	√	√
35	male	403.24	ABBOTT	405.11	ABBOTT	9.32	XinChuang	√	√	√	√	√	√	√	√	√	√	√
54	male	694.66	ABBOTT	676.64	ABBOTT	11.39	XinChuang	√	√	√	√	√	√	√	√	√	√	√
52	male	393.36	ABBOTT	385.72	ABBOTT	24.15	Livzon	√	√	√	√	√	√	√	√	√	√	√
48	male	322.85	ABBOTT	324.09	ABBOTT	17.69	XinChuang	√	√	√	√	√	√	√	√	√	√	√
46	male	314.39	ABBOTT	312.57	ABBOTT	10.034	XinChuang	√	√	√	√	√	√	√	√	√	√	√
33	male	1049.84	ABBOTT	1035.1	ABBOTT	32.15	XinChuang	√	√	√	√	√	√	√	√	√	√	√
25	male	729.99	ABBOTT	723.71	ABBOTT	16.31	XinChuang	√	√	√	√	√	√	√	√	√	√	√
48	female	660.06	ABBOTT	661.02	ABBOTT	42.13	XinChuang	√	√	√	√	√	√	√	√	√	√	√
23	male	784.53	ABBOTT	782.23	ABBOTT	35.43	Livzon	√	√	√	√	√	√	√	√	√	√	√
22	male	554.61	ABBOTT	542.27	ABBOTT	32.11	Livzon	√	√	√	√	√	√	√	√	√	√	√
40	male	584.09	ABBOTT	579.86	ABBOTT	28.67	Livzon	√	√	√	√	√	√	√	√	√	√	√
28	male	596.8	ABBOTT	587.3	ABBOTT	42.13	Livzon	√	√	√	√	√	√	√	√	√	√	√
30	male	903.83	ABBOTT	888.33	ABBOTT	49.61	XinChuang	√	√	√	√	√	√	√	√	√	√	√
30	male	1069.32	ABBOTT	1043.34	ABBOTT	21.06	XinChuang	√	√	√	√	√	√	√	√	√	√	√
35	male	1047.83	ABBOTT	1073.45	ABBOTT	22.76	WanTai	√	√	√	√	√	√	√	√	√	√	√
32	male	214.17	ABBOTT	215.28	ABBOTT	18.74	WanTai	√	√	√	√	√	√	√	√	√	√	√
32	male	1047.12	ABBOTT	1032.52	ABBOTT	12.46	XinChuang	√	√	√	√	√	√	√	√	√	√	√
31	male	851.93	ABBOTT	827.78	ABBOTT	11.38	XinChuang	√	√	√	√	√	√	√	√	√	√	√
34	male	393.52	ABBOTT	390.42	ABBOTT	12.9	XinChuang	√	√	√	√	√	√	√	√	√	√	√
47	male	666.79	ABBOTT	671.71	ABBOTT	33.79	WanTai	√	√	√	√	√	√	√	√	√	√	√
45	male	514.32	ABBOTT	503.69	ABBOTT	15.012	WanTai	√	√	√	√	√	√	√	√	√	√	√
38	male	245.26	ABBOTT	245.37	ABBOTT	10.342	WanTai	√	√	√	√	√	√	√	√	√	√	√
34	male	948.29	ABBOTT	947.3	ABBOTT	23.35	XinChuang	√	√	√	√	√	√	√	√	√	√	√
47	male	819.32	ABBOTT	819.47	ABBOTT	27.98	XinChuang	√	√	√	√	√	√	√	√	√	√	√
42	male	400.05	ABBOTT	395.41	ABBOTT	29.05	Livzon	√	√	√	√	√	√	√	√	√	√	√
44	male	615.52	ABBOTT	613.06	ABBOTT	39.08	Livzon	√	√	√	√	√	√	√	√	√	√	√
51	male	747.34	ABBOTT	747.34	ABBOTT	36.77	WanTai	√	√	√	√	√	√	√	√	√	√	√
47	male	1261.62	ABBOTT	1274.32	ABBOTT	29.12	XinChuang	√	√	√	√	√	√	√	√	√	√	√
54	male	477.31	ABBOTT	505.84	ABBOTT	11.02	XinChuang	√	√	√	√	√	√	√	√	√	√	√
26	male	690.91	ABBOTT	693.21	ABBOTT	33.79	WanTai	√	√	√	√	√	√	√	√	√	√	√
46	female	507.11	ABBOTT	499.9	ABBOTT	8.75	XinChuang	√	√	√	√	√	√	√	√	√	√	√
54	male	859.8	ABBOTT	857.5	ABBOTT	27.19	XinChuang	√	√	√	√	√	√	√	√	√	√	√
48	male	723.29	ABBOTT	718.63	ABBOTT	18.748	WanTai	√	√	√	√	√	√	√	√	√	√	√
21	male	497.37	ABBOTT	502.3	ABBOTT	21.4149	XinChuang	√	√	√	√	√	√	√	√	√	√	√
43	male	481.68	ABBOTT	483.12	ABBOTT	15.68	WanTai	√	√	√	√	√	√	√	√	√	√	√
57	male	622.75	ABBOTT	625.83	ABBOTT	27.02	WanTai	√	√	√	√	√	√	√	√	√	√	√
53	male	930.57	ABBOTT	931.78	ABBOTT	14.25	WanTai	√	√	√	√	√	√	√	√	√	√	√
33	male	603.08	ABBOTT	598	ABBOTT	11	XinChuang	√	√	√	√	√	√	√	√	√	√	√
34	male	463.07	ABBOTT	464.16	ABBOTT	16.11	WanTai	√	√	√	√	√	√	√	√	√	√	√
46	female	463.52	ABBOTT	461.02	ABBOTT	21.405	XinChuang	√	√	√	√	√	√	√	√	√	√	√
48	male	567.22	ABBOTT	535.04	ABBOTT	7.08	XinChuang	√	√	√	√	√	√	√	√	√	√	√
63	male	501.33	ABBOTT	542.67	ABBOTT	17.446	WanTai	√	√	√	√	√	√	√	√	√	√	√
29	male	298.29	ABBOTT	299.46	ABBOTT	17.23	XinChuang	√	√		√	√	√	√	√	√	√	√
59	male	105.44	ABBOTT	104.38	ABBOTT	21.56	XinChuang	√	√		√	√	√	√	√	√	√	√
28	male	151.65	ABBOTT	158.88	ABBOTT	19.72	XinChuang	√	√		√	√	√	√	√	√	√	√
34	male	102.22	ABBOTT	95.1	ABBOTT	10.143	WanTai	√	√		√	√	√	√	√	√	√	√
25	male	174.59	ABBOTT	175.61	ABBOTT	12.17	XinChuang	√	√		√	√	√	√	√	√	√	√
29	male	183.41	ABBOTT	184.51	ABBOTT	22.4	WanTai	√	√		√	√	√	√	√	√	√	√
31	male	76.58	ABBOTT	81.39	ABBOTT	10.126	XinChuang	√	√		√	√	√	√	√	√	√	√
25	male	97.01	ABBOTT	108.1	ABBOTT	24.025	WanTai	√	√		√	√	√	√	√	√	√	√
37	male	217.22	ABBOTT	194.39	ABBOTT	17.935	WanTai	√	√		√	√	√	√	√	√	√	√
36	male	255.09	ABBOTT	252.3	ABBOTT	18.27	Livzon	√	√		√	√	√	√	√	√	√	√
39	male	369.87	ABBOTT	343.22	ABBOTT	19.628	WanTai	√	√		√	√	√	√	√	√	√	√
21	male	185,45	ABBOTT	205.41	ABBOTT	6.977	WanTai	√	√		√	√	√	√	√	√	√	√
23	male	217.31	ABBOTT	215.76	ABBOTT	10.26	Livzon	√	√		√	√	√	√	√	√	√	√
28	male	361.53	ABBOTT	360.82	ABBOTT	24.86	XinChuang	√	√		√	√	√	√	√	√	√	√
46	male	318.94	ABBOTT	323.09	ABBOTT	34.12	Livzon	√	√		√	√	√	√	√	√	√	√
29	male	223.47	ABBOTT	216.38	ABBOTT	18.93	XinChuang	√	√		√	√	√	√	√	√	√	√
24	male	147.9	ABBOTT	157.2	ABBOTT	17.788	XinChuang	√	√		√	√	√	√	√	√	√	√
27	male	158.4	ABBOTT	158.61	ABBOTT	11.02	XinChuang	√	√		√	√	√	√	√	√	√	√
47	male	353.15	ABBOTT	357.21	ABBOTT	21.39	XinChuang	√	√		√	√	√	√	√	√	√	√
62	male	240	ABBOTT	239	ABBOTT	10.83	XinChuang	√	√		√	√	√	√	√	√	√	√
27	male	76.84	ABBOTT	83.88	ABBOTT	10.83	WanTai	√	√		√	√	√	√	√	√	√	√
61	male	91.3	ABBOTT	85.9	ABBOTT	19.25	XinChuang	√	√		√	√	√	√	√	√	√	√
27	male	192.98	ABBOTT	191.01	ABBOTT	14.01	WanTai	√	√		√	√	√	√	√	√	√	√
31	male	266.63	ABBOTT	284.29	ABBOTT	15.13	XinChuang	√	√		√	√	√	√	√	√	√	√
47	male	248.96	ABBOTT	239.68	ABBOTT	15.32	XinChuang	√	√		√	√	√	√	√	√	√	√
31	male	364.56	ABBOTT	365.61	ABBOTT	25.67	XinChuang	√	√		√	√	√	√	√	√	√	√
39	male	208.3	ABBOTT	209.1	ABBOTT	12.98	Livzon	√	√		√	√	√	√	√	√	√	√
20	male	332.28	ABBOTT	313.94	ABBOTT	8.75	XinChuang	√	√		√	√	√	√	√	√	√	√
25	male	230.66	ABBOTT	228.17	ABBOTT	23.43	XinChuang	√	√		√	√	√	√	√	√	√	√
35	male	436.68	ABBOTT	434.56	ABBOTT	17.45	XinChuang	√	√		√	√	√	√	√	√	√	√
25	male	497.12	ABBOTT	486.8	ABBOTT	18.5	Livzon	√	√		√	√	√	√	√	√	√	√
19	male	381.96	ABBOTT	366.78	ABBOTT	10.009	WanTai	√	√		√	√	√	√	√	√	√	√
43	male	579.62	ABBOTT	580.8	ABBOTT	12.32	XinChuang	√	√		√	√	√	√	√	√	√	√
47	male	674.92	ABBOTT	673.84	ABBOTT	14.35	XinChuang	√	√		√	√	√	√	√	√	√	√
36	male	460.71	ABBOTT	465.39	ABBOTT	17.24	Livzon	√	√		√	√	√	√	√	√	√	√
26	male	312.9	ABBOTT	304.06	ABBOTT	18.333	WanTai	√	√		√	√	√	√	√	√	√	√
23	male	448.11	ABBOTT	462.77	ABBOTT	15.033	WanTai	√	√		√	√	√	√	√	√	√	√
31	male	271.52	ABBOTT	1.6654	ABBOTT	234.15	XinChuang	√	√		√	√	√	√	√	√	√	√
65	male	536.7	ABBOTT	472.19	ABBOTT	16.166	WanTai	√	√		√	√	√	√	√	√	√	√
40	male	510.01	ABBOTT	501.36	ABBOTT	8.9	XinChuang	√	√		√	√	√	√	√	√	√	√
21	male	509.34	ABBOTT	510.12	ABBOTT	34.28	Livzon	√	√		√	√	√	√	√	√	√	√
62	male	155.2	ABBOTT	91.15	ABBOTT	2.98	XinChuang	√	√		√	√	√	√	√	√	√	√
40	female	226.11	ABBOTT	221.15	ABBOTT	5.72	XinChuang	√	√		√	√	√	√	√	√	√	√
38	male	175.65	ABBOTT	171.39	ABBOTT	10.408	WanTai	√	√		√	√	√	√	√	√	√	√
50	male	164.6	ABBOTT	160.3	ABBOTT	17.99	WanTai	√	√		√	√	√	√	√	√	√	√
56	male	179.42	ABBOTT	174.51	ABBOTT	16.31	XinChuang	√	√		√	√	√	√	√	√	√	√
40	male	267.83	ABBOTT	262.41	ABBOTT	16.54	XinChuang	√	√		√	√	√	√	√	√	√	√
44	male	298.88	ABBOTT	192.8	ABBOTT	13.69	XinChuang	√	√		√	√	√	√	√	√	√	√
16	male	206.77	ABBOTT	206.7	ABBOTT	18.37	XinChuang	√	√		√	√	√	√	√	√	√	√
29	male	138.21	ABBOTT	137.52	ABBOTT	22.67	Livzon	√	√		√	√	√	√	√	√	√	√
37	male	229.66	ABBOTT	233.31	ABBOTT	16.89	XinChuang	√	√		√	√	√	√	√	√	√	√
45	male	283.66	ABBOTT	279.95	ABBOTT	13.56	XinChuang	√	√		√	√	√	√	√	√	√	√
25	male	171.27	ABBOTT	170.3	ABBOTT	13.09	WanTai	√	√		√	√	√	√	√	√	√	√
56	male	161.76	ABBOTT	162.52	ABBOTT	12.65	XinChuang	√	√		√	√	√	√	√	√	√	√
46	male	113.95	ABBOTT	112.06	ABBOTT	17.85	XinChuang	√	√		√	√	√	√	√	√	√	√
54	male	179.68	ABBOTT	173.02	ABBOTT	20.787	WanTai	√	√		√	√	√	√	√	√	√	√
34	male	127.91	ABBOTT	127.07	ABBOTT	22.115	WanTai	√	√		√	√	√	√	√	√	√	√
47	male	108.08	ABBOTT	126.17	ABBOTT	21.376	WanTai	√	√		√	√	√	√	√	√	√	√
24	male	185.84	ABBOTT	192.11	ABBOTT	19.756	XinChuang	√	√		√	√	√	√	√	√	√	√
50	male	161.12	ABBOTT	170.97	ABBOTT	14.24	WanTai	√	√		√	√	√	√	√	√	√	√
48	male	353.51	ABBOTT	351.68	ABBOTT	25.36	WanTai	√	√		√	√	√	√	√	√	√	√
35	male	143.18	ABBOTT	147.12	ABBOTT	14.3794	XinChuang	√	√		√	√	√	√	√	√	√	√
47	male	273.13	ABBOTT	274.22	ABBOTT	13.42	XinChuang	√	√		√	√	√	√	√	√	√	√
51	male	419	ABBOTT	388.23	ABBOTT	21.634	WanTai	√	√		√	√	√	√	√	√	√	√
20	male	187.76	ABBOTT	188.75	ABBOTT	11.02	XinChuang	√	√		√	√	√	√	√	√	√	√
27	male	193.76	ABBOTT	192.01	ABBOTT	11.37	XinChuang	√	√		√	√	√	√	√	√	√	√
21	male	82.49	ABBOTT	80.11	ABBOTT	15.64	WanTai	√	√		√	√	√	√	√	√	√	√
33	male	37.92	ABBOTT	37.61	ABBOTT	13.96	XinChuang	√	√			√	√	√	√	√	√	√
22	male	53.54	ABBOTT	50.68	ABBOTT	9.854	WanTai	√	√			√	√	√	√	√	√	√
36	male	74.58	ABBOTT	73.81	ABBOTT	17.65	Livzon	√	√			√	√	√	√	√	√	√
42	male	52.88	ABBOTT	51.65	ABBOTT	5.32	XinChuang	√	√			√	√	√	√	√	√	√
15	male	40.9	ABBOTT	41.3	ABBOTT	7.68	XinChuang	√	√			√	√	√	√	√	√	√
16	male	95.06	ABBOTT	95.24	ABBOTT	3.32	XinChuang	√	√			√	√	√	√	√	√	√
41	male	64.33	ABBOTT	62.12	ABBOTT	0.8	XinChuang	√	√			√	√	√	√	√	√	√
36	male	53.1	ABBOTT	52.3	ABBOTT	21.33	WanTai	√	√			√	√	√	√	√	√	√
24	male	82	ABBOTT	82	ABBOTT	18.73	XinChuang	√	√			√	√	√	√	√	√	√
21	male	86	ABBOTT	85.5	ABBOTT	12.98	XinChuang	√	√			√	√	√	√	√	√	√
42	male	179.76	ABBOTT	178.82	ABBOTT	9.26	Livzon	√	√			√	√	√	√	√	√	√
25	male	109.04	ABBOTT	102.15	ABBOTT	9.72	WanTai	√	√			√	√	√	√	√	√	√
29	male	90.06	ABBOTT	90.1	ABBOTT	8.922	XinChuang	√	√			√	√	√	√	√	√	√
26	male	34.56	ABBOTT	33.21	ABBOTT	16.23	WanTai	√	√			√	√	√	√	√	√	√
33	male	262.02	ABBOTT	270.61	ABBOTT	7.35	XinChuang	√	√			√	√	√	√	√	√	√
63	male	145.55	ABBOTT	154.09	ABBOTT	9.865	WanTai	√	√			√	√	√	√	√	√	√
47	female	45.1	ABBOTT	43.9	ABBOTT	12.1	Livzon	√	√			√	√	√	√	√	√	√
38	male	37.02	ABBOTT	38.63	ABBOTT	10.258	XinChuang	√	√			√	√	√	√	√	√	√
26	male	200	ABBOTT	199.8	ABBOTT	8.99	WanTai	√	√			√	√	√	√	√	√	√
27	male	76.2	ABBOTT	75.44	ABBOTT	19.932	XinChuang	√	√			√	√	√	√	√	√	√
29	male	404.78	ABBOTT	415.95	ABBOTT	8.458	XinChuang	√	√			√	√	√	√	√	√	√
27	male	183.11	ABBOTT	208.77	ABBOTT	13.98	XinChuang	√	√			√	√	√	√	√	√	√
49	male	116.41	ABBOTT	116.31	ABBOTT	9.19	WanTai	√	√			√	√	√	√	√	√	√
43	male	191.88	ABBOTT	179.88	ABBOTT	15.2	XinChuang	√	√			√	√	√	√	√	√	√
32	male	40.2	ABBOTT	42.31	ABBOTT	11.03	WanTai		√			√		√	√	√	√	√
26	male	39.95	ABBOTT	38.75	ABBOTT	13.29	WanTai E	√	√			√	√	√	√	√	√	√
44	male	107.38	ABBOTT	108.66	ABBOTT	16.23	XinChuang	√	√			√	√	√	√	√	√	√
30	male	85.25	ABBOTT	89.39	ABBOTT	14.39	XinChuang	√	√			√	√	√	√	√	√	√
27	male	20.73	ABBOTT	22.51	ABBOTT	21.859	XinChuang	√	√			√	√	√	√	√	√	√
52	male	63.31	ABBOTT	67.25	ABBOTT	15.35	XinChuang		√			√	√	√	√	√	√	√
26	male	63.38	ABBOTT	64.92	ABBOTT	23.01	XinChuang		√			√	√	√	√	√	√	√
35	male	148.5	ABBOTT	148.62	ABBOTT	16.41	XinChuang		√			√	√	√	√	√	√	√
23	male	42.49	ABBOTT	44.74	ABBOTT	6.76	XinChuang		√			√	√	√	√	√	√	√
50	female	25.8	ABBOTT	23.87	ABBOTT	9.03	XinChuang	√	√				√	√	√	√	√	√
42	female	10.56	ABBOTT	11.24	ABBOTT	2.85	XinChuang		√				√	√	√	√	√	√
29	male	20.24	ABBOTT	19.78	ABBOTT	14.671	XinChuang		√				√	√	√	√	√	√
22	male	25.41	ABBOTT	25.44	ABBOTT	6.73	WanTai		√					√	√	√	√	√
55	male	16.84	ABBOTT	16.24	ABBOTT	8.25	XinChuang		√					√	√	√	√	√
27	male	55.51	ABBOTT	53.81	ABBOTT	9.036	WanTai		√					√	√	√	√	√
48	male	30.51	ABBOTT	29.6	ABBOTT	7.12	XinChuang		√						√	√	√	√
32	male	16.9	ABBOTT	17.24	ABBOTT	24.613	WanTai		√							√	√	√
49	male	18.71	ABBOTT	19.04	ABBOTT	6.958	WanTai		√							√	√	√
33	male	17.83	ABBOTT	16.92	ABBOTT	5.46	Livzon		√							√	√	√
18	male	22.47	ABBOTT	23,12	ABBOTT	9.01	XinChuang		√							√	√	√
37	male	16.75	ABBOTT	17.49	ABBOTT	9.13	XinChuang		√							√	√	√
28	female	29.59	ABBOTT	27.92	ABBOTT	8.58	XinChuang		√							√	√	√
22	male	14.77	ABBOTT	13.62	ABBOTT	4.5987	WanTai		√							√	√	√
26	male	21.8	ABBOTT	20	ABBOTT	5.8541	WanTai		√							√	√	√
24	male	24.22	ABBOTT	25.32	ABBOTT	8.23	WanTai		√							√	√	√
79	male	12.57	ABBOTT	11.54	ABBOTT	0.17	XinChuang									√	√	√
27	male	8.41	ABBOTT	7.89	ABBOTT	2.13	XinChuang		√									√
57	female	9.28	ABBOTT	10.16	ABBOTT	1.02	WanTai		√									√
23	female	6.11	ABBOTT	6.5	ABBOTT	0.01	XinChuang		√									√
23	female	10.72	ABBOTT	11.03	ABBOTT	2.01	WanTai		√									√
75	male	8.08	ABBOTT	10.41	ABBOTT	1.07	XinChuang		√									√
62	female	5.03	ABBOTT	5.02	ABBOTT	0.03	WanTai		√									√
27	male	5.31	ABBOTT	5.1	ABBOTT	0	WanTai									√	√	√
28	male	7.12	ABBOTT	6.96	ABBOTT	0	XinChuang		√									√
28	male	13.98	ABBOTT	12.02	ABBOTT	2.12	Livzon		√									√
31	male	15.17	ABBOTT	15.16	ABBOTT	1.02	Livzon									√	√	√
47	male	11.49	ABBOTT	14.32	ABBOTT	0.01	XinChuang									√	√	√
26	female	5.86	ABBOTT	5.84	ABBOTT	0	XinChuang		√									√
24	male	8.38	ABBOTT	7.24	ABBOTT	1.1845	WanTai		√									√
40	male	14.39	ABBOTT	14.18	ABBOTT	3.63	XinChuang											√
24	female	1.58	ABBOTT	1.42	ABBOTT	0	WanTai											√
59	female	1.62	ABBOTT	1.71	ABBOTT	0	XinChuang											√
69	female	2.03	ABBOTT	1.78	ABBOTT	0	XinChuang											√
46	male	2.29	ABBOTT	2.52	ABBOTT	0	XinChuang											√
28	female	1.77	ABBOTT	1.2	ABBOTT	0.01	XinChuang											√
56	female	1.68	ABBOTT	1.65	ABBOTT	0	WanTai											√
54	female	2.58	ABBOTT	2.38	ABBOTT	0	WanTai											√
35	female	2.35	ABBOTT	2.39	ABBOTT	0.001	XinChuang E											√
29	female	1.94	ABBOTT	1.82	ABBOTT	0.01	XinChuang											√
59	male	1.39	ABBOTT	1.38	ABBOTT	0	WanTai											√
62	male	2.43	ABBOTT	1.7	ABBOTT	0	WanTai											√
46	female	2.85	ABBOTT	2.98	ABBOTT	0.03	XinChuang											√
61	female	1.05	ABBOTT	1.07	ABBOTT	0	Livzon											√
43	female	2.18	ABBOTT	2.17	ABBOTT	0	WanTai											√
30	female	2.51	ABBOTT	2.57	ABBOTT	0.03	XinChuang											√
27	female	1.36	ABBOTT	1.39	ABBOTT	0	XinChuang											√
69	female	3.18	ABBOTT	2.51	ABBOTT	0.071	XinChuang											√
33	female	1.35	ABBOTT	1.28	ABBOTT	0	XinChuang											√
23	female	7.3	ABBOTT	7.35	ABBOTT	1.2223	Livzon											√
63	male	4.39	ABBOTT	2.57	ABBOTT	0.0034	XinChuang											√
64	female	1.52	ABBOTT	1.62	ABBOTT	0	Livzon											√
46	male	6.53	ABBOTT	5.57	ABBOTT	0	Livzon											√
72	male	1.08	ABBOTT	1.2	ABBOTT	0	WanTai											√
30	female	2.05	ABBOTT	2.18	ABBOTT	1.169	XinChuang											√
37	female	5.11	ABBOTT	5.99	ABBOTT	0.054	XinChuang											√
65	male	1.07	ABBOTT	1.1	ABBOTT	1.01	XinChuang											√
7	female	1.38	ABBOTT	1.32	ABBOTT	0	XinChuang											√
62	female	1.19	ABBOTT	1.08	ABBOTT	0	Livzon											√
39	male	2.48	ABBOTT	2.65	ABBOTT	0.132	XinChuang											√
21	male	1.65	ABBOTT	1.13	ABBOTT	0.01	WanTai											√
59	female	1.26	ABBOTT	1.08	ABBOTT	0	WanTai											√
49	female	1.69	ABBOTT	1.95	ABBOTT	0	Livzon											√
30	female	1.37	ABBOTT	1.5	ABBOTT	0.08	XinChuang											√
31	female	1.51	ABBOTT	4.501	ABBOTT	0	Livzon											√
62	male	6.26	ABBOTT	7.62	ABBOTT	1.13	XinChuang											√
68	male	1.82	ABBOTT	1.9	ABBOTT	0.01	XinChuang											√
49	female	1.87	ABBOTT	1.78	ABBOTT	0	XinChuang											√
34	female	4.16	ABBOTT	4.14	ABBOTT	1.04	XinChuang											√
22	female	5.92	ABBOTT	5.83	ABBOTT	0	XinChuang											√
45	female	1.3	ABBOTT	1.37	ABBOTT	0.03	XinChuang											√
62	male	2	ABBOTT	2.15	ABBOTT	0	WanTai											√
34	female	5.07	ABBOTT	5.44	ABBOTT	0.003	XinChuang											√
79	male	1.75	ABBOTT	2.07	ABBOTT	0	WanTai											√
30	male	1.48	ABBOTT	1.42	ABBOTT	0.04	WanTai											√
45	male	1.09	ABBOTT	1.11	ABBOTT	0	XinChuang											√
27	female	1.57	ABBOTT	2.45	ABBOTT	0	WanTai											√
86	male	1.32	ABBOTT	1.01	ABBOTT	0	Livzon											√
84	male	5.59	ABBOTT	5.66	ABBOTT	0	WanTai											√
33	male	1.66	ABBOTT	1.76	ABBOTT	0.05	XinChuang											√
37	male	4.91	ABBOTT	5.09	ABBOTT	1.41	XinChuang											√
45	female	3.06	ABBOTT	2.65	ABBOTT	0.01	WanTai											√
23	male	5.12	ABBOTT	3.5	ABBOTT	0	XinChuang											√
66	male	5.17	ABBOTT	5.29	ABBOTT	0	WanTai											√

## Sheet: Sheet2
Initial screening(n=56)				Duplicate retesting				Western blot
								gag				pol			env			QC	HIV-2 band
Age	Gender	Result	Kit	Result	Kit1	Result	Kit2	p17	p24	p39	p55	p31	p51	p66	gp41	gp120	gp160
48	male	17.24	Livzon	13.04	Livzon	21.3	WanTai	√	√	√	√	√	√	√	√	√	√	√
36	male	8.83	Livzon	12.28	Livzon	18.51	WanTai	√	√	√	√	√	√	√	√	√	√	√
48	female	7.93	Livzon	9.07	Livzon	18.26	XinChuang	√	√	√	√	√	√	√	√	√	√	√
30	male	14.02	Livzon	11.79	Livzon	16.93	XinChuang	√	√	√	√	√	√	√	√	√	√	√
32	male	8.952	Livzon	8.922	Livzon	17.35	WanTai	√	√	√	√	√	√	√	√	√	√	√
26	male	14.17	Livzon	10.23	Livzon	14.21	WanTai	√	√	√	√	√	√	√	√	√	√	√
55	male	13.89	Livzon	9.89	Livzon	17.64	XinChuang	√	√	√	√	√	√	√	√	√	√	√
48	male	14	Livzon	16.49	Livzon	18.45	WanTai	√	√	√	√	√	√	√	√	√	√	√
56	male	14	Livzon	12.19	Livzon	23.13	XinChuang	√	√	√	√	√	√	√	√	√	√	√
31	male	17.228	Livzon	18.478	Livzon	15.23	XinChuang	√	√	√	√	√	√	√	√	√	√	√
40	male	14	Livzon	15.03	Livzon	24.23	XinChuang	√	√	√	√	√	√	√	√	√	√	√
19	male	4.426	Livzon	3.045	Livzon	28.78	XinChuang	√	√	√	√	√	√	√	√	√	√	√
28	male	19.727	Livzon	20.231	Livzon	23.56	XinChuang	√	√	√	√	√	√	√	√	√	√	√
22	male	17.762	Livzon	17.373	Livzon	13.47	WanTai	√	√	√	√	√	√	√	√	√	√	√
42	male	24.796	Livzon	25.435	Livzon	17.15	WanTai	√	√	√	√	√	√	√	√	√	√	√
48	male	13.05	Livzon	12.73	Livzon	17.89	WanTai	√	√	√	√	√	√	√	√	√	√	√
45	male	11.68	Livzon	4.52	Livzon	27.9	XinChuang	√	√	√	√	√	√	√	√	√	√	√
21	male	13.08	Livzon	8.39	Livzon	25.36	XinChuang	√	√	√	√	√	√	√	√	√	√	√
33	male	14	Livzon	14	Livzon	32.12	WanTai	√	√	√	√	√	√	√	√	√	√	√
33	male	18.791	Livzon	19.176	Livzon	19.03	WanTai	√	√	√	√	√	√	√	√	√	√	√
30	male	12.55	Livzon	11.44	Livzon	19.68	XinChuang	√	√	√	√	√	√	√	√	√	√	√
42	male	16.135	Livzon	16	Livzon	18.88	XinChuang	√	√	√	√	√	√	√	√	√	√	√
65	male	9.55	Livzon	10.26	Livzon	9.03	WanTai	√	√	√	√	√	√	√	√	√	√	√
28	male	19.342	Livzon	19.051	Livzon	26.89	WanTai	√	√	√	√	√	√	√	√	√	√	√
21	male	20.336	Livzon	19.706	Livzon	19.79	XinChuang	√	√	√	√	√	√	√	√	√	√	√
45	male	13.17	Livzon	13.04	Livzon	20.08	XinChuang	√	√	√	√	√	√	√	√	√	√	√
35	male	8.75	Livzon	11.21	Livzon	19.48	XinChuang	√	√	√	√	√	√	√	√	√	√	√
51	male	12.96	Livzon	13.22	Livzon	20.8	WanTai	√	√	√	√	√	√	√	√	√	√	√
33	male	13.08	Livzon	13.1	Livzon	20.02	WanTai	√	√	√	√	√	√	√	√	√	√	√
52	male	12.398	Livzon	12.825	Livzon	15.23	WanTai	√	√	√	√	√	√	√	√	√	√	√
27	male	11.93	Livzon	11.55	Livzon	18.25	WanTai	√	√	√	√	√	√	√	√	√	√	√
33	male	6.08	Livzon	8.72	Livzon	19.35	XinChuang	√	√	√	√	√	√	√	√	√	√	√
50	female	12.688	Livzon	12.522	Livzon	28.89	XinChuang	√	√		√	√	√	√	√	√	√	√
40	male	18.797	Livzon	18.718	Livzon	30.19	XinChuang	√	√		√	√	√	√	√	√	√	√
44	male	9.66	Livzon	10.19	Livzon	20.02	XinChuang	√	√		√	√	√	√	√	√	√	√
43	male	9.414	Livzon	8.6396	Livzon	8.5203	WanTai	√	√		√	√	√	√	√	√	√	√
49	male	6.713	Livzon	5.03	Livzon	0.67	XinChuang	√	√		√	√	√	√	√	√	√	√
23	male	9.05	Livzon	8.83	Livzon	20.08	XinChuang	√	√		√	√	√	√	√	√	√	√
25	female	5.93	Livzon	7.05	Livzon	0.96	WanTai	√	√		√	√	√	√	√	√	√	√
28	female	23.559	Livzon	18.846	Livzon	34.14	XinChuang	√	√		√	√	√	√	√	√	√	√
32	male	14.83	Livzon	14.79	Livzon	20.84	WanTai	√	√		√	√	√	√	√	√	√	√
51	male	12.244	Livzon	9.248	Livzon	13.47	XinChuang	√	√		√	√	√	√	√	√	√	√
28	male	9.71	Livzon	13.45	Livzon	18.44	XinChuang	√	√		√	√	√	√	√	√	√	√
33	female	10.77	Livzon	9.54	Livzon	16.62	XinChuang	√	√		√	√	√	√	√	√	√	√
28	male	5.747	Livzon	4.458	Livzon	0.82	XinChuang	√	√			√	√	√	√	√	√	√
42	male	8.75	Livzon	6.15	Livzon	0.94	XinChuang	√	√			√	√	√	√	√	√	√
36	male	4.87	Livzon	5.18	Livzon	0.88	WanTai	√	√			√	√	√	√	√	√	√
61	male	7.66	Livzon	8.86	Livzon	0.73	WanTai	√	√				√	√	√	√	√	√
50	male	4.67	Livzon	10.53	Livzon	18.05	WanTai	√	√				√	√	√	√	√	√
42	male	9.04	Livzon	8.57	Livzon	18.71	WanTai		√			√	√		√	√	√	√
25	male	4.59	Livzon	5.23	Livzon	0.86	XinChuang		√							√	√	√
44	female	4.377	Livzon	3.714	Livzon	0.01	XinChuang		√									√
40	male	2.949	Livzon	2.645	Livzon	1.29	XinChuang									√	√	√
47	male	2.823	Livzon	2.0257	Livzon	0	XinChuang											√
21	male	1.834	Livzon	1.876	Livzon	0	XinChuang											√
75	male	1.01	Livzon	1.86	Livzon	0	WanTai											√

## Sheet: Sheet3
Initial screening(n=138)				Duplicate retesting				Western blot
								gag				pol			env			QC	HIV-2 band
Age	Gender	Result	Kit	Result	Kit1	Result	Kit2	p17	p24	p39	p55	p31	p51	p66	gp41	gp120	gp160
31	male	18.1914	XinChuang	16.0782	XinChuang	21.77	WanTai	√	√	√	√	√	√	√	√	√	√	√
57	male	14.489	XinChuang	13.44	XinChuang	7.99	Livzon	√	√	√	√	√	√	√	√	√	√	√
37	male	25.66	XinChuang	26.41	XinChuang	29.22	WanTai	√	√	√	√	√	√	√	√	√	√	√
27	male	31.543	XinChuang	1.372	XinChuang	27.9	Livzon	√	√	√	√	√	√	√	√	√	√	√
44	male	29.32	XinChuang	28.66	XinChuang	27.35	WanTai	√	√	√	√	√	√	√	√	√	√	√
19	male	20	XinChuang	24.14	XinChuang	15.24	Livzon	√	√	√	√	√	√	√	√	√	√	√
23	male	22.357	XinChuang	22.625	XinChuang	23.13	WanTai	√	√	√	√	√	√	√	√	√	√	√
35	male	19.7	XinChuang	22.373	XinChuang	14.209	WanTai	√	√	√	√	√	√	√	√	√	√	√
35	male	17.5	XinChuang	17.48	XinChuang	38.1	WanTai	√	√	√	√	√	√	√	√	√	√	√
46	male	26.7	XinChuang	23.593	XinChuang	16.606	Livzon	√	√	√	√	√	√	√	√	√	√	√
58	male	29.32	XinChuang	29.01	XinChuang	30.1	WanTai	√	√	√	√	√	√	√	√	√	√	√
30	male	18.89	XinChuang	19.2	XinChuang	22.33	WanTai	√	√	√	√	√	√	√	√	√	√	√
61	male	20.828	XinChuang	17.916	XinChuang	18.88	Livzon	√	√	√	√	√	√	√	√	√	√	√
29	male	16.204	XinChuang	6.102	XinChuang	9.03	Livzon	√	√	√	√	√	√	√	√	√	√	√
29	male	19.855	XinChuang	26.78	XinChuang	33.55	WanTai	√	√	√	√	√	√	√	√	√	√	√
55	male	15.488	XinChuang	14.992	XinChuang	10.98	Livzon	√	√	√	√	√	√	√	√	√	√	√
29	male	15.7942	XinChuang	15.383	XinChuang	23.13	WanTai	√	√	√	√	√	√	√	√	√	√	√
33	male	18.783	XinChuang	19.012	XinChuang	15.23	WanTai	√	√	√	√	√	√	√	√	√	√	√
75	male	18.825	XinChuang	17.632	XinChuang	24.23	WanTai	√	√	√	√	√	√	√	√	√	√	√
25	male	31.2	XinChuang	31.53	XinChuang	31.12	Livzon	√	√	√	√	√	√	√	√	√	√	√
47	male	23.473	XinChuang	23.78	XinChuang	20.443	Livzon	√	√	√	√	√	√	√	√	√	√	√
30	male	16.257	XinChuang	16.901	XinChuang	6.17	WanTai	√	√	√	√	√	√	√	√	√	√	√
28	male	12.053	XinChuang	2.075	XinChuang	12.45	Livzon	√	√	√	√	√	√	√	√	√	√	√
51	male	19.621	XinChuang	19.626	XinChuang	12.774	WanTai	√	√	√	√	√	√	√	√	√	√	√
22	male	28.08	XinChuang	7.38	XinChuang	9.63	Livzon	√	√	√	√	√	√	√	√	√	√	√
53	male	29.13	XinChuang	29.32	XinChuang	30.31	WanTai	√	√	√	√	√	√	√	√	√	√	√
52	male	14.1499	XinChuang	15.435	XinChuang	14.498	WanTai	√	√	√	√	√	√	√	√	√	√	√
43	male	28.5	XinChuang	29.2	XinChuang	28.8	WanTai	√	√	√	√	√	√	√	√	√	√	√
40	male	31.02	XinChuang	30.12	XinChuang	31.38	WanTai	√	√	√	√	√	√	√	√	√	√	√
31	male	22.133	XinChuang	30.453	XinChuang	29.1	WanTai	√	√	√	√	√	√	√	√	√	√	√
25	male	13.9023	XinChuang	13.3807	XinChuang	12.394	WanTai	√	√	√	√	√	√	√	√	√	√	√
66	male	25.06	XinChuang	25.96	XinChuang	26.8	WanTai	√	√	√	√	√	√	√	√	√	√	√
20	male	25.03	XinChuang	25.63	XinChuang	26.72	WanTai	√	√	√	√	√	√	√	√	√	√	√
54	male	16.11	XinChuang	22.55	XinChuang	13.13	Livzon	√	√	√	√	√	√	√	√	√	√	√
33	male	19.32	XinChuang	19.273	XinChuang	32.28	WanTai	√	√	√	√	√	√	√	√	√	√	√
31	male	18.953	XinChuang	10.82	XinChuang	9.03	Livzon	√	√	√	√	√	√	√	√	√	√	√
51	male	14.441	XinChuang	12.875	XinChuang	15.67	WanTai	√	√	√	√	√	√	√	√	√	√	√
32	male	31.58	XinChuang	31.74	XinChuang	32.22	WanTai	√	√	√	√	√	√	√	√	√	√	√
24	male	23.33	XinChuang	24.02	XinChuang	25.32	WanTai	√	√	√	√	√	√	√	√	√	√	√
62	female	19.805	XinChuang	19.605	XinChuang	6.688	WanTai	√	√	√	√	√	√	√	√	√	√	√
25	male	22.425	XinChuang	2.658	XinChuang	37.67	WanTai	√	√	√	√	√	√	√	√	√	√	√
56	female	29.66	XinChuang	30.22	XinChuang	30.08	WanTai	√	√	√	√	√	√	√	√	√	√	√
45	male	29.88	XinChuang	29.72	XinChuang	30.12	WanTai	√	√	√	√	√	√	√	√	√	√	√
30	male	21.305	XinChuang	1.312	XinChuang	25.36	WanTai	√	√	√	√	√	√	√	√	√	√	√
30	male	16.981	XinChuang	18.21	XinChuang	32.12	WanTai	√	√	√	√	√	√	√	√	√	√	√
64	male	20.55	XinChuang	14.47	XinChuang	19.03	WanTai	√	√	√	√	√	√	√	√	√	√	√
55	male	28.55	XinChuang	28.87	XinChuang	30.05	WanTai	√	√	√	√	√	√	√	√	√	√	√
55	male	28.63	XinChuang	29.03	XinChuang	30.15	WanTai	√	√	√	√	√	√	√	√	√	√	√
33	male	28.31	XinChuang	28.67	XinChuang	29.12	WanTai	√	√	√	√	√	√	√	√	√	√	√
59	female	31.089	XinChuang	1.101	XinChuang	28.76	WanTai	√	√	√	√	√	√	√	√	√	√	√
26	male	20.273	XinChuang	21.007	XinChuang	5.672	WanTai	√	√	√	√	√	√	√	√	√	√	√
23	male	16.21	XinChuangF	16.32	XinChuang	18.46	WanTai	√	√	√	√	√	√	√	√	√	√	√
45	male	28.8	XinChuang	29.02	XinChuang	29.05	Livzon	√	√	√	√	√	√	√	√	√	√	√
29	male	19.141	XinChuang	18.952	XinChuang	24.45	WanTai	√	√	√	√	√	√	√	√	√	√	√
66	male	18.1	XinChuang	18.3	XinChuang	28.76	WanTai	√	√	√	√	√	√	√	√	√	√	√
29	male	32.534	XinChuang	2.512	XinChuang	18.23	WanTai	√	√	√	√	√	√	√	√	√	√	√
49	male	21.491	XinChuang	21.491	XinChuang	23.67	Livzon	√	√	√	√	√	√	√	√	√	√	√
70	female	49.6	XinChuang	48	XinChuang	22.14	Livzon	√	√	√	√	√	√	√	√	√	√	√
36	male	27.67	XinChuang	25.12	XinChuang	25.35	WanTai	√	√	√	√	√	√	√	√	√	√	√
41	male	24.566	XinChuang	0.12	XinChuang	26.14	WanTai	√	√	√	√	√	√	√	√	√	√	√
24	male	8.079	XinChuang	7.89	XinChuang	10.98	WanTai	√	√		√	√	√	√	√	√	√	√
35	male	11.364	XinChuang	10.942	XinChuang	15.23	WanTai	√	√		√	√	√	√	√	√	√	√
25	male	10.085	XinChuang	12.679	XinChuang	16.148	WanTai	√	√		√	√	√	√	√	√	√	√
33	male	12.438	XinChuang	10.54	XinChuang	34.075	WanTai	√	√		√	√	√	√	√	√	√	√
25	male	12.62	XinChuang	10.54	XinChuang	29.825	WanTai	√	√		√	√	√	√	√	√	√	√
23	female	13.85	XinChuang	14.21	XinChuang	15.08	WanTai	√	√		√	√	√	√	√	√	√	√
28	male	23.1	XinChuang	24,21	XinChuang	22.4	WanTai	√	√		√	√	√	√	√	√	√	√
43	male	29.4	XinChuang	12.11	XinChuang	18.54	WanTai	√	√		√	√	√	√	√	√	√	√
14	male	13.08	XinChuang	13.02	XinChuang	13.69	Livzon	√	√		√	√	√	√	√	√	√	√
29	male	21.534	XinChuang	2.512	XinChuang	19.25	WanTai	√	√		√	√	√	√	√	√	√	√
35	male	28.12	XinChuang	8.23	XinChuang	9.03	WanTai	√	√		√	√	√	√	√	√	√	√
28	male	12.15	XinChuang	2.21	XinChuang	3.16	WanTai	√	√		√	√	√	√	√	√	√	√
45	male	22.521	XinChuang	21.482	XinChuang	34.28	WanTai	√	√		√	√	√	√	√	√	√	√
66	male	18.1	XinChuang	18.3	XinChuang	25.67	WanTai	√	√		√	√	√	√	√	√	√	√
49	male	21.491	XinChuang	21.491	XinChuang	43.14	WanTai	√	√		√	√	√	√	√	√	√	√
70	female	49.6	XinChuang	48	XinChuang	23.89	Livzon	√	√		√	√	√	√	√	√	√	√
36	male	27.67	XinChuang	25.12	XinChuang	29.35	Livzon	√	√		√	√	√	√	√	√	√	√
41	male	29.566	XinChuang	0.12	XinChuang	18.73	WanTai	√	√		√	√	√	√	√	√	√	√
43	male	22.33	XinChuang	21.58	XinChuang	30.25	WanTai	√	√		√	√	√	√	√	√	√	√
53	male	19.31	XinChuang	29.46	XinChuang	8.43	Livzon	√	√		√	√	√	√	√	√	√	√
48	male	20.21	XinChuang	29.66	XinChuang	8.57	Livzon	√	√		√	√	√	√	√	√	√	√
54	male	26.03	XinChuang	26.9	XinChuang	28.3	WanTai	√	√		√	√	√	√	√	√	√	√
27	male	30.33	XinChuang	31.21	XinChuang	32.06	WanTai	√	√		√	√	√	√	√	√	√	√
45	male	23.673	XinChuang	19320	XinChuang	16.003	WanTai	√	√		√	√	√	√	√	√	√	√
41	male	31.62	XinChuang	29.62	XinChuang	28,11	WanTai	√	√		√	√	√	√	√	√	√	√
32	male	29.11	XinChuang	28.41	XinChuang	29.96	WanTai	√	√		√	√	√	√	√	√	√	√
40	male	15.705	XinChuang	15.973	XinChuang		WanTai	√	√		√		√	√	√	√	√	√
31	female	29.89	XinChuang	29.72	XinChuang	30.11	WanTai	√	√		√	√	√	√	√	√	√	√
53	male	29.88	XinChuang	30.02	XinChuang	30.11	WanTai	√	√		√	√	√	√	√	√	√	√
27	male	17.83	XinChuang	17.72	XinChuang		Livzon	√	√		√	√	√	√	√	√	√	√
35	female	30.11	XinChuang	29.98	XinChuang	31.02	Livzon	√	√		√	√	√	√	√	√	√	√
64	male	30.12	XinChuang	30.28	XinChuang	31.11	WanTai	√	√		√	√	√	√	√	√	√	√
41	male	30.04	XinChuangXinChuang	30.193	XinChuang	36.006	WanTai	√	√		√	√	√	√	√	√	√	√
32	male	28.14	XinChuang	28.22	XinChuang	29.13	WanTai	√	√		√	√	√	√	√	√	√	√
46	female	28.04	XinChuang	28.06	XinChuang	28.08	WanTai	√	√		√	√	√	√	√	√	√	√
46	female	30.12	XinChuang	30.09	XinChuang	31.11	WanTai	√	√		√	√	√	√	√	√	√	√
26	male	20.273	XinChuang	21.007	XinChuang	5.672	WanTai	√	√		√		√	√	√	√	√	√
58	male	21.207	XinChuang	28.46	XinChuang	24.122	WanTai	√	√		√	√	√	√	√	√	√	√
36	male	19.52	XinChuang	11.26	XinChuang	9.59	WanTai	√	√		√	√	√	√	√	√	√	√
24	female	15.453	XinChuang	10.846	XinChuang	10.521	WanTai	√	√			√	√	√	√	√	√	√
24	male	28.23	XinChuang	27.17	XinChuang	30.21	WanTai	√	√			√	√	√	√	√	√	√
27	male	14.949	XinChuang	15.169	XinChuang	13.482	WanTai	√	√			√	√	√	√	√	√	√
47	male	12.948	XinChuang	12.074	XinChuang	19.09	WanTai	√	√			√	√	√	√	√	√	√
42	female	13.086	XinChuang	17.868	XinChuang	13.787	WanTai	√	√			√	√	√	√	√	√	√
32	male	13.205	XinChuang	3.085	XinChuang	30.12	WanTai	√	√			√	√	√	√	√	√	√
33	male	14.507	XinChuang	13.918	XinChuang	17.2	WanTai	√	√			√	√	√	√	√	√	√
49	male	13.181	XinChuang	12.6607	XinChuang	9.8985	WanTai	√	√			√	√	√	√	√	√	√
24	male	14.22	XinChuang	13.8	XinChuang	15.12	WanTai	√	√			√	√	√	√	√	√	√
45	female	19.6	XinChuang	18.84	XinChuang	8.79	Livzon	√	√			√	√	√	√	√	√	√
34	male	17.49	XinChuang	9.43	XinChuang	9.26	WanTai	√	√			√	√	√	√	√	√	√
48	female	10.22	XinChuang	8.855	XinChuang	6.04	WanTai	√	√			√	√	√	√	√	√	√
58	male	11.232	XinChuang	1.351	XinChuang	19.11	WanTai	√	√			√	√	√	√	√	√	√
30	male	9.766	XinChuang	9.882	XinChuang	8.99	Livzon		√			√	√	√	√	√	√	√
44	male	9.125	XinChuang	6.5645	XinChuang	7.7053	WanTai		√				√	√	√	√	√	√
43	female	9.274	XinChuang	1.265	XinChuang	5.78	Livzon		√				√	√	√	√	√	√
37	male	13.121	XinChuang	7.252	XinChuang	19.79	WanTai		√					√	√	√	√	√
50	male	5.113	XinChuang	4.56	XinChuang	9.6	WanTai		√							√	√	√
18	male	7.464	XinChuang	1.449	XinChuang	2.618	WanTai		√							√	√	√
38	male	6.21	XinChuang	6.56	XinChuang	7.2	WanTai		√							√	√	√
24	female	6.78	XinChuang	6.85	XinChuang	4.56	Livzon		√							√	√	√
75	male	5.46	XinChuang	6.41	XinChuang	7.01	WanTai		√							√	√	√
34	female	5.89	XinChuang	6.8014	XinChuang	11.23	WanTai		√							√	√	√
44	female	6.204	XinChuang	15.801	XinChuang	3.79	Livzon		√							√	√	√
30	female	4.023	XinChuang	2.684	XinChuang	1.47	WanTai									√	√	√
60	male	3.103	XinChuang	8.053	XinChuang	3.103	WanTai		√									√
23	male	2.098	XinChuang	2.292	XinChuang	1.306	WanTai											√
77	female	6.434	XinChuang	1.189	XinChuang	0	WanTai											√
59	male	6.434	XinChuang	9.135	XinChuang	1.13	Livzon
30	male	2.72	XinChuang	6.113	XinChuang	0.013	WanTai											√
48	male	1.837	XinChuang	0.864	XinChuang	0	WanTai											√
22	female	1.91	XinChuang	2.03	XinChuang	0.01	WanTai											√
38	male	1.823	XinChuang	1.893	XinChuang	0	WanTai											√
32	male	1.291	XinChuang	1.281	XinChuang	0	WanTai											√
35	female	2.046	XinChuang	8944	XinChuang	1.75	WanTai											√
24	male	2.273	XinChuang	9.215	XinChuang	0	WanTai											√
36	male	3.435	XinChuang	7.12	XinChuang	2.12	WanTai											√
40	male	3.15	XinChuang	1.94	XinChuang	1.02	WanTai											√
28	male	3.02	XinChuang	1.924	XinChuang	0	WanTai											√

## Sheet: Sheet4
Initial screening(n=162)				Duplicate retesting				Western blot
								gag				pol			env			QC	HIV-2 band
Age	Gender	Result	Kit	Result	Kit1	Result	Kit2	p17	p24	p39	p55	p31	p51	p66	gp41	gp120	gp160
34	male	6.79	WanTai	7.02	WanTai	6.13	XinChuang	√	√	√	√	√	√	√	√	√	√	√
66	male	43.277	WanTai	47.78	WanTai	21.23	XinChuang	√	√	√	√	√	√	√	√	√	√	√
41	male	42.7	WanTai	35.8	WanTai	401.1	XinChuang	√	√	√	√	√	√	√	√	√	√	√
48	male	34.43	WanTai	49.59	WanTai	16.32	XinChuang	√	√	√	√	√	√	√	√	√	√	√
25	female	25.12	WanTai	24.67	WanTai	23.22	XinChuang	√	√	√	√	√	√	√	√	√	√	√
38	male	28.422	WanTai	34.223	WanTai	161.7	XinChuang	√	√	√	√	√	√	√	√	√	√	√
36	male	46.22	WanTai	36.006	WanTai	13.9	Livzon	√	√	√	√	√	√	√	√	√	√	√
24	male	13.778	WanTai	37.525	WanTai	6.28	XinChuang	√	√	√	√	√	√	√	√	√	√	√
30	female	49.64	WanTai	20.937	WanTai	28.63	XinChuang	√	√	√	√	√	√	√	√	√	√	√
52	male	33.66	WanTai	50.472	WanTai	34.73	Livzon	√	√	√	√	√	√	√	√	√	√	√
27	male	42.03	WanTai	44.222	WanTai	14.38	XinChuang	√	√	√	√	√	√	√	√	√	√	√
38	male	40.12	WanTai	42.857	WanTai	12.27	XinChuang	√	√	√	√	√	√	√	√	√	√	√
36	male	4.939	WanTai	4.549	WanTai		XinChuang	√	√	√	√	√	√	√	√	√	√	√
24	male	42.35	WanTai	47.06	WanTai	25.52	XinChuang	√	√	√	√	√	√	√	√	√	√	√
25	male	37.41	WanTai	40.29	WanTai	30.3	Livzon	√	√	√	√	√	√	√	√	√	√	√
33	male	44.876	WanTai	44.915	WanTai	39.52	XinChuang	√	√	√	√	√	√	√	√	√	√	√
28	male	41.03	WanTai	44.53	WanTai	23.2	Livzon	√	√	√	√	√	√	√	√	√	√	√
31	male	12.92	WanTai	13.27	WanTai	10.62	XinChuang	√	√	√	√	√	√	√	√	√	√	√
27	male	47.1	WanTai	47.34	WanTai	12.9	XinChuang	√	√	√	√	√	√	√	√	√	√	√
19	male	53.64	WanTai	35.884	WanTai	26.8	XinChuang	√	√	√	√	√	√	√	√	√	√	√
21	female	37.48	WanTai	26.29	WanTai	31.4	XinChuang	√	√	√	√	√	√	√	√	√	√	√
56	male	26.29	WanTai	42.346	WanTai	12,12	Livzon	√	√	√	√	√	√	√	√	√	√	√
44	male	26.71	WanTai	38.91	WanTai	11.1	Livzon	√	√	√	√	√	√	√	√	√	√	√
43	male	41.23	WanTai	22.37	WanTai	21.2	Livzon	√	√	√	√	√	√	√	√	√	√	√
39	male	22.46	WanTai	47.69	WanTai	11.7	XinChuang	√	√	√	√	√	√	√	√	√	√	√
53	male	23.126	WanTai	18.392	WanTai	18.78	XinChuang	√	√	√	√	√	√	√	√	√	√	√
25	male	23.74	WanTai	47.25	WanTai	20.18	XinChuang	√	√	√	√	√	√	√	√	√	√	√
23	male	22.74	WanTai	48.01	WanTai	15.45	Livzon	√	√	√	√	√	√	√	√	√	√	√
51	male	46.83	WanTai	42.13	WanTai	10.01	Livzon	√	√	√	√	√	√	√	√	√	√	√
40	male	20.717	WanTai	12.09	WanTai	12.49	XinChuang	√	√	√	√	√	√	√	√	√	√	√
33	male	14.095	WanTai	10.403	WanTai	18.92	XinChuang	√	√	√	√	√	√	√	√	√	√	√
33	male	14.319	WanTai	9.316	WanTai	8.97	Livzon	√	√	√	√	√	√	√	√	√	√	√
34	female	48.36	WanTai	51.705	WanTai	26.43	Livzon	√	√	√	√	√	√	√	√	√	√	√
54	female	43.48	WanTai	41.569	WanTai	11.3	Livzon	√	√	√	√	√	√	√	√	√	√	√
27	male	32.583	WanTai	31.097	WanTai	35.02	XinChuang	√	√	√	√	√	√	√	√	√	√	√
41	male	18.9	WanTai	29.016	WanTai	18.9	XinChuang	√	√	√	√	√	√	√	√	√	√	√
44	male	40.71	WanTai	30.351	WanTai	35.37	XinChuang	√	√	√	√	√	√	√	√	√	√	√
46	male	20.266	WanTai	19.608	WanTai	14.21	XinChuang	√	√	√	√	√	√	√	√	√	√	√
51	male	19.34	WanTai	20.592	WanTai	17.64	XinChuang	√	√	√	√	√	√	√	√	√	√	√
24	male	18.212	WanTai	20.92	WanTai	6.99211	Livzon	√	√	√	√	√	√	√	√	√	√	√
33	male	18.54	WanTai	13.496	WanTai	7.29885	Livzon	√	√	√	√	√	√	√	√	√	√	√
20	male	15.9137	WanTai	12.11	WanTai	19.9935	XinChuang	√	√	√	√	√	√	√	√	√	√	√
26	male	40.37	WanTai	40.345	WanTai	41.62	XinChuang	√	√	√	√	√	√	√	√	√	√	√
36	male	12.127	WanTai	13.339	WanTai	10.067	XinChuang	√	√	√	√	√	√	√	√	√	√	√
31	male	28.844	WanTai	22.795	WanTai	14.56	XinChuang	√	√	√	√	√	√	√	√	√	√	√
25	male	42.918	WanTai	51.216	WanTai	31.54	XinChuang	√	√	√	√	√	√	√	√	√	√	√
28	female	38.34	WanTai	48.376	WanTai	26.7	XinChuang	√	√	√	√	√	√	√	√	√	√	√
47	male	11.823	WanTai	8.618	WanTai	16.76	XinChuang	√	√	√	√	√	√	√	√	√	√	√
20	male	14	WanTai	14	WanTai	27.79	XinChuang	√	√	√	√	√	√	√	√	√	√	√
36	female	21.0631	WanTai	阳	WanTai	20.8281	XinChuang	√	√	√	√	√	√	√	√	√	√	√
28	male	13.44	WanTai	47.15	WanTai	14.21	XinChuang	√	√	√	√	√	√	√	√	√	√	√
28	female	27.29	WanTai	32.38	WanTai	33.21	XinChuang	√	√	√	√	√	√	√	√	√	√	√
39	male	21.765	WanTai	22.934	WanTai	15.23	Livzon	√	√	√	√	√	√	√	√	√	√	√
37	male	22.113	WanTai	24.54	WanTai	9.87	Livzon	√	√	√	√	√	√	√	√	√	√	√
42	male	22.3989	WanTai	16.89	WanTai	22.0842	XinChuang	√	√	√	√	√	√	√	√	√	√	√
43	male	45.102	WanTai	46.152	WanTai	33.12	XinChuang	√	√	√	√	√	√	√	√	√	√	√
27	male	22.73	WanTai	19.41	WanTai	16.76	XinChuang	√	√	√	√	√	√	√	√	√	√	√
37	male	14.01	WanTai	11.78	WanTai	28.01	XinChuang	√	√	√	√	√	√	√	√	√	√	√
37	female	12.36	WanTai	10.92	WanTai	18.77	XinChuang	√	√	√	√	√	√	√	√	√	√	√
46	male	11.32	WanTai	10.75	WanTai	26.59	XinChuang	√	√	√	√	√	√	√	√	√	√	√
28	male	21.34	WanTai	20.23	WanTai	19.14	XinChuang	√	√	√	√	√	√	√	√	√	√	√
22	female	33.41	WanTai	31.14	WanTai	30.11	XinChuang	√	√	√	√	√	√	√	√	√	√	√
44	male	29.52	WanTai	30.12	WanTai	29.01	XinChuang	√	√	√	√	√	√	√	√	√	√	√
43	male	29.45	WanTai	30.14	WanTai	29.12	XinChuang	√	√	√	√	√	√	√	√	√	√	√
27	male	22.52	WanTai	21.36	WanTai	20.3	XinChuang	√	√	√	√	√	√	√	√	√	√	√
60	female	15.88	WanTai	16.02	WanTai	13.12	XinChuang	√	√	√	√	√	√	√	√	√	√	√
23	male	31.462	WanTai	36.006	WanTai	24.82	XinChuang	√	√	√	√	√	√	√	√	√	√	√
38	male	53.378	WanTai	42.65	WanTai	10.65	XinChuang	√	√	√	√	√	√	√	√	√	√	√
26	male	48.42	WanTai	18.26	WanTai	16.32	XinChuang	√	√	√	√	√	√	√	√	√	√	√
21	male	44.57	WanTai	40.36	WanTai	26.14	XinChuang	√	√	√	√	√	√	√	√	√	√	√
40	male	43.21	WanTai	45.29	WanTai	32.45	Livzon	√	√	√	√	√	√	√	√	√	√	√
24	male	25.629	WanTai	28.04	WanTai	14.17	XinChuang	√	√	√	√	√	√	√	√	√	√	√
31	male	39.754	WanTai	29.83	WanTai	21.89	XinChuang	√	√	√	√	√	√	√	√	√	√	√
55	male	35.574	WanTai	43.298	WanTai	16.21	XinChuang	√	√	√	√	√	√	√	√	√	√	√
30	male	30.65	WanTai	40.59	WanTai	21.25	XinChuang	√	√	√	√	√	√	√	√	√	√	√
25	female	44.66	WanTai	49.735	WanTai	27.765	XinChuang	√	√	√	√	√	√	√	√	√	√	√
47	male	33.65	WanTai	50.408	WanTai	17.56	XinChuang	√	√	√	√	√	√	√	√	√	√	√
28	male	20.33	WanTai	38.612	WanTai	27.29	XinChuang	√	√	√	√	√	√	√	√	√	√	√
39	male	40.64	WanTai	44.065	WanTai	23.73	XinChuang	√	√	√	√	√	√	√	√	√	√	√
55	male	41.57	WanTai	41.946	WanTai	38.53	XinChuang	√	√	√	√	√	√	√	√	√	√	√
24	male	14.12	WanTai	16.17	WanTai	24.21	XinChuang	√	√		√	√	√	√	√	√	√	√
38	male	11.87	WanTai	11.75	WanTai	7.37475	XinChuang	√	√		√	√	√	√	√	√	√	√
32	male	19.8	WanTai	19.699	WanTai	14.22	XinChuang	√	√		√	√	√	√	√	√	√	√
39	male	56.58	WanTai	42.066	WanTai	24.6	XinChuang	√	√		√	√	√	√	√	√	√	√
33	male	35.87	WanTai	50.97	WanTai	25.7	XinChuang	√	√		√	√	√	√	√	√	√	√
45	male	42.32	WanTai	57.355	WanTai	263	XinChuang	√	√		√	√	√	√	√	√	√	√
22	male	41.563	WanTai	42.965	WanTai	29.4	XinChuang	√	√		√	√	√	√	√	√	√	√
34	male	37.131	WanTai	42.125	WanTai	13.3	XinChuang	√	√		√	√	√	√	√	√	√	√
51	male	42.361	WanTai	43.529	WanTai	21.2	XinChuang	√	√		√	√	√	√	√	√	√	√
23	male	24.364	WanTai	20.379	WanTai	22.11	XinChuang	√	√		√	√	√	√	√	√	√	√
32	male	23.415	WanTai	22.226	WanTai	23.15	XinChuang	√	√		√	√	√	√	√	√	√	√
38	male	22.322	WanTai	20.956	WanTai	8.47	Livzon	√	√		√	√	√	√	√	√	√	√
27	male	47.62	WanTai	45.23	WanTai	19.5	XinChuang	√	√		√	√	√	√	√	√	√	√
29	male	32.278	WanTai	50.051	WanTai	829.2	XinChuang	√	√		√	√	√	√	√	√	√	√
34	male	56.52	WanTai	37.898	WanTai	30.34	XinChuang	√	√		√	√	√	√	√	√	√	√
54	male	48.85	WanTai	46.463	WanTai	39.89	XinChuang	√	√		√	√	√	√	√	√	√	√
27	male	50.84	WanTai	20.332	WanTai	25.13	XinChuang	√	√		√	√	√	√	√	√	√	√
61	male	36.28	WanTai	31.724	WanTai	26.8	XinChuang	√	√		√	√	√	√	√	√	√	√
29	male	28.658	WanTai	34.99	WanTai	18.13	Livzon	√	√		√	√	√	√	√	√	√	√
61	female	39.856	WanTai	53.2	WanTai	26.21	Livzon	√	√		√	√	√	√	√	√	√	√
66	male	34.46	WanTai	49.814	WanTai	36.51	XinChuang	√	√		√	√	√	√	√	√	√	√
46	male	11.136	WanTai	16.168	WanTai	17.36	XinChuang	√	√		√	√	√	√	√	√	√	√
47	male	14.14	WanTai	18.45	WanTai	12.76	XinChuang	√	√		√	√	√	√	√	√	√	√
33	female	15	WanTai	7.59	WanTai	18.85	XinChuang	√	√		√	√	√	√	√	√	√	√
45	female	14.22	WanTai	17.34	WanTai	19.12	XinChuang	√	√		√	√	√	√	√	√	√	√
48	male	14.78	WanTai	18.09	WanTai	13.79	XinChuang	√	√		√	√	√	√	√	√	√	√
41	male	15.32	WanTai	15	WanTai	7.64	XinChuang	√	√		√	√	√	√	√	√	√	√
44	male	56.52	WanTai	37.898	WanTai	30.34	XinChuang	√	√		√	√	√	√	√	√	√	√
25	male	21.831	WanTai	22。388	WanTai	7.64	Livzon	√	√		√	√	√	√	√	√	√	√
22	male	14	WanTai	14.25	WanTai	21.87	XinChuang	√	√		√	√	√	√	√	√	√	√
33	male	35.77	WanTai	17.964	WanTai	19.79	XinChuang	√	√		√	√	√	√	√	√	√	√
28	male	56.22	WanTai	33.514	WanTai	22.102	XinChuang	√	√		√	√	√	√	√	√	√	√
48	male	51.538	WanTai	54.671	WanTai	37.13	XinChuang	√	√		√	√	√	√	√	√	√	√
28	male	12.1	WanTai	11.48	WanTai	27.79	XinChuang	√	√		√	√	√	√	√	√	√	√
25	male	11.79	WanTai	11.31	WanTai	27.66	XinChuang	√	√		√	√	√	√	√	√	√	√
18	male	13.1	WanTai	10.78	WanTai	27.12	XinChuang	√	√		√	√	√	√	√	√	√	√
30	male	23.44	WanTai	11.52	WanTai	27.35	XinChuang	√	√		√	√	√	√	√	√	√	√
28	male	23.81	WanTai		WanTai	28.93	XinChuang	√	√		√	√	√	√	√	√	√	√
44	male	17.242	WanTai	18.669	WanTai	29.12	Livzon	√	√		√	√	√	√	√	√	√	√
49	male	40.36	WanTai	23.79	WanTai	16.97	XinChuang	√	√		√	√	√	√	√	√	√	√
49	male	23.147	WanTai	30.251	WanTai	22.12	XinChuang	√	√		√	√	√	√	√	√	√	√
62	male	47.527	WanTai	37.527	WanTai	20.79	XinChuang	√	√		√	√	√	√	√	√	√	√
25	male	49.62	WanTai	31.797	WanTai	26.17	XinChuang	√	√		√	√	√	√	√	√	√	√
29	male	44.27	WanTai	47.08	WanTai	27.62	XinChuang	√	√		√	√	√	√	√	√	√	√
27	male	46.89	WanTai	30.206	WanTai	33.75	XinChuang	√	√		√	√	√	√	√	√	√	√
59	male	21.07	WanTai	20.418	WanTai	19.09	XinChuang	√	√		√	√	√	√	√	√	√	√
67	male	29.9	WanTai	34.245	WanTai	20.5	XinChuang	√	√		√	√	√	√	√	√	√	√
38	male	39.56	WanTai	44.535	WanTai	16.05	XinChuang	√	√		√	√	√	√	√	√	√	√
17	male	22.589	WanTai	24.463	WanTai	9.39	Livzon	√	√		√	√	√	√	√	√	√	√
24	male	48.27	WanTai	29.04	WanTai	13.11	XinChuang	√	√		√	√	√	√	√	√	√	√
31	male	15.528	WanTai	33.125	WanTai	19.19	XinChuang	√	√			√	√	√	√	√	√	√
37	male	18.98	WanTai	26.198	WanTai	21.21	XinChuang	√	√			√	√	√	√	√	√	√
25	male	18.93	WanTai	21.264	WanTai	12.13	Livzon	√	√			√	√	√	√	√	√	√
29	male	45.046	WanTai	44.26	WanTai	20.4	XinChuang	√	√			√	√	√	√	√	√	√
34	male	49.55	WanTai	22.247	WanTai	36.12	XinChuang	√	√			√	√	√	√	√	√	√
51	male	29.58	WanTai	30.12	WanTai	28.39	XinChuang	√	√			√	√	√	√	√	√	√
55	male	30.56	WanTai	28.31	WanTai	27.12	XinChuang	√	√			√	√	√	√	√	√	√
28	male	9.158	WanTai	17.82	WanTai	12.5	XinChuang	√	√			√	√	√	√	√	√	√
32	male	28.13	WanTai	45.17	WanTai	24.6	XinChuang	√	√			√	√	√	√	√	√	√
29	male	18.8	WanTai	22.586	WanTai	15.36	XinChuang	√	√			√	√	√	√	√	√	√
37	male	12.35	WanTai	13	WanTai	10.56	XinChuang		√				√	√	√	√	√	√
29	male	9.176	WanTai	13.15	WanTai	10.74	XinChuang		√				√	√	√	√	√	√
22	male	8.82	WanTai	1.72	WanTai	9.13	XinChuang		√					√	√	√	√	√
34	male	10	WanTai	8	WanTai	5.23	Livzon		√				√		√	√	√	√
17	male	8.83	WanTai	26.089	WanTai	103.22	XinChuang		√						√	√	√	√
83	female	5.83	WanTai	9.02	WanTai	7.56	XinChuang		√									√
49	male	4.82	WanTai	16.21	WanTai	12.32	XinChuang		√									√
26	female	2.08	WanTai	7.08	WanTai	1.462	XinChuang		√									√
75	female	3.2352	WanTai	2.19	WanTai	7.2702	XinChuang		√									√
33	male	3.06	WanTai	11.81	WanTai	0.8	XinChuang		√									√
31	male	4.22	WanTai	0.62	WanTai	0	XinChuang		√									√
48	male	5.19	WanTai	4.17	WanTai	0.04	XinChuang		√									√
42	female	7.31	WanTai	6.958	WanTai	0.03	XinChuang									√	√	√
19	male	2.44	WanTai	1.56	WanTai	1.39	XinChuang											√
45	male	1.08	WanTai	1.16	WanTai	0.01	XinChuang											√
25	male	1.08	WanTai	1.98	WanTai	0	XinChuang											√
34	male	1.28	WanTai	2.67	WanTai	0.01	XinChuang											√
32	male	1.85	WanTai	1.04	WanTai	0	XinChuang											√
42	male	1.43	WanTai	1.93	WanTai	0	XinChuang											√
32	female	1.68	WanTai	2.14	WanTai	0	XinChuang
29	male	1.99	WanTai	1.23	WanTai	0	XinChuang
27	male	2.46	WanTai	1.87	WanTai	2.12	XinChuang
